# Supplementary material for: Symbiotic association of microalgae and plants in a deep water culture system
Source: PeerJ. 2022 Dec 7;10:e14536. doi: 10.7717/peerj.14536 (PMC9745926; doi:10.7717/peerj.14536)
Supplement: Supplemental Information 1 — There were three replicates in each application and the experiments were repeated three times. For this reason, the average of nine data was taken. The Figure 4 shows the growth curves of C. vulgaris for different treatments (■ HCM1: DWC+Microalgae+Aeration; ● HCM2: DWC+Microalgae; ♦ MAC: Microalgae+Aeration) [file peerj-10-14536-s001.xlsx]

## Sheet: Sheet1
MAC		OD at 680 nm
Time (hour)		Experiment1	Experiment2	Experiment3
0	1	0.412	0.452	0.443
	2	0.438	0.397	0.439
	3	0.386	0.425	0.496
72	1	0.891	0.978	1.003
	2	0.942	0.885	1.112
	3	0.845	0.912	1.136
96	1	1.196	1.225	1.148
	2	1.144	1.185	1.265
	3	1.013	1.243	1.301
168	1	1.765	1.792	1.701
	2	1.712	1.722	1.796
	3	1.588	1.843	1.886
240	1	2.074	2.105	1.987
	2	1.887	2.016	2.048
	3	1.805	2.188	2.245
336	1	2.032	2.096	2.008
	2	1.992	1.998	1.968
	3	1.976	2.195	2.202
HCM1		OD at 680 nm
Time (hour)		Experiment1	Experiment2	Experiment3
0	1	0.386	0.412	0.448
	2	0.374	0.385	0.362
	3	0.382	0.398	0.326
72	1	0.421	0.442	0.475
	2	0.407	0.425	0.406
	3	0.412	0.441	0.388
96	1	0.574	0.593	0.612
	2	0.548	0.578	0.556
	3	0.562	0.58	0.523
168	1	0.77	0.792	0.778
	2	0.735	0.778	0.762
	3	0.769	0.782	0.731
240	1	0.868	0.912	0.881
	2	0.845	0.865	0.852
	3	0.865	0.896	0.841
336	1	0.836	0.872	0.854
	2	0.824	0.849	0.823
	3	0.86	0.873	0.817
HCM2		OD at 680 nm
Time (hour)		Experiment1	Experiment2	Experiment3
0	1	0.426	0.469	0.445
	2	0.452	0.427	0.462
	3	0.433	0.453	0.466
72	1	0.439	0.482	0.463
	2	0.47	0.44	0.474
	3	0.451	0.468	0.485
96	1	0.456	0.498	0.477
	2	0.486	0.452	0.49
	3	0.468	0.478	0.498
168	1	0.545	0.578	0.548
	2	0.601	0.546	0.582
	3	0.557	0.563	0.583
240	1	0.712	0.735	0.728
	2	0.782	0.722	0.726
	3	0.72	0.731	0.738
336	1	0.678	0.693	0.665
	2	0.743	0.689	0.673
	3	0.674	0.682	0.702
