# Supplementary material for: Symbiotic association of microalgae and plants in a deep water culture system
Source: PeerJ. 2022 Dec 7;10:e14536. doi: 10.7717/peerj.14536 (PMC9745926; doi:10.7717/peerj.14536)
Supplement: Supplemental Information 3 — There were three replicates in each application and the experiments were repeated four times due to not applicable data. For this reason, the average of twelve or nine data was taken. In the table, the first column shows the initial values taken in the beginning of the experiments, and the other column shows the values taken at the end of the experiments. The Figure 6 shows the percentage of DO in the DWC at the beginning and the end of the experiments (HCM1: DWC+Microalgae + Aeration; HCM2: DWC+Microalgae; HCM3: DWC+Aeration; HCM4: DWC) [file peerj-10-14536-s003.xlsx]

## Sheet: Amount of Dissolved oxygen
Data set for Figure 6
	Amount of Dissolved oxygen (%)
			Experiment 1	Experiment 2	Experiment 3	Experiment 4		Experiment 1	Experiment 2	Experiment 3	Experiment 4
HCM1	1	Initial values (At the beginning)	58.2	46.8	35	59	Final values (At the harvest)	32.6	32.6	16.7	29.1
	2		58.6	46.8	36	50		27.4	27.4	16.4	29.5
	3		59.3	41.7	33	53		33.3	33.3	16.5	28.7
HCM2	4		54.5	45.1	36	49,8		34	34	20.4	33
	5		60.6	44.7	35	54,5		33	33	19.4	34.7
	6		51	45.7	36.7	55,1		34.2	34.2	16.9	33.7
HCM3	7		NA	74	33	50		37.7	37.7	14	29
	8		NA	72	35	48,2		38	38	14.3	27.7
	9		NA	73	36	58		36	36	14.2	29.2
HCM4	10		49	63	33	52,3		35.9	35.9	13.8	28
	11		49	60	33	54		37.5	37.5	14.1	27.1
	12		49	64	34	60		37.8	37.8	14.2	27.7
