# Supplementary material for: Symbiotic association of microalgae and plants in a deep water culture system
Source: PeerJ. 2022 Dec 7;10:e14536. doi: 10.7717/peerj.14536 (PMC9745926; doi:10.7717/peerj.14536)
Supplement: Supplemental Information 4 — There were three replicates in each application and the experiments were repeated three times. For this reason, the average of nine data was taken. In the table, the first column shows the initial values taken in the beginning of the experiments, and the other column shows the values taken at the end of the experiments. The Figure 8 shows the difference in the heights of the mint seedling between at the beginning and at the end of the experiments (HCM1: DWC+Microalgae + Aeration; HCM2: DWC+Microalgae; HCM3: DWC+Aeration; HCM4: DWC), data are means ± SD (n= 9) [file peerj-10-14536-s004.xlsx]

## Sheet: Height of seedlings
Data set for Figure 8
Height of the seedlings (cm)
			Experiment 1	Experiment 2	Experiment 3		Experiment 1	Experiment 2	Experiment 3
HCM1	1	Initial values (At the beginning)	8	10.2	14.45	Final values (At the harvest)	15.71	15.6	15.14
	2		8.5	11.4	14.45		11.08	12.3	15.16
	3		8.5	10.5	15		11.63	12.36	16
HCM2	4		7.1	9.2	12		12.1	11.44	12.5
	5		8	10	11.5		9.85	10.33	11.41
	6		9	9.5	12		13.69	9.67	11.56
HCM3	7		9	8.5	13		30	15.5	12.64
	8		9	9.5	13		15.98	10	13.5
	9		9.5	8.6	14		15.67	12.5	14.24
HCM4	10		9.5	8	13.2		14.17	14.48	17.4
	11		8.5	7.8	13.5		13.18	11.5	16
	12		8.5	8.5	12.3		9.11	8.41	13.8
