# Supplementary material for: Symbiotic association of microalgae and plants in a deep water culture system
Source: PeerJ. 2022 Dec 7;10:e14536. doi: 10.7717/peerj.14536 (PMC9745926; doi:10.7717/peerj.14536)
Supplement: Supplemental Information 5 — There were three replicates in each application and the experiments were repeated three times. For this reason, the average of nine data was taken. In the first row of the table, the measurements taken from a randomly selected leaf were given as the initial value. The Table 3 shows L*, a*, b* and Hue values of mint leaves before and after treatments. Means with different letters indicate significant differences according to the Tukey’s HSD test (P<0.05) (n = 9). Chlorophyll values were given and discussed in the text. [file peerj-10-14536-s005.xlsx]

## Sheet: Color measurements
Data set for Table 3
Color measurements
L* values		Experiment 1	Experiment 2	Experiment 3
	Initial value	38.62	40.51	37.96
HCM1	1	41.37	42.18	42.61
	2	39.63	39.92	37.09
	3	42.16	41.58	41.42
HCM2	4	41.16	42.21	41.07
	5	42.99	43.96	44.57
	6	43.11	41.87	42.61
HCM3	7	42.61	42.12	43.37
	8	41.62	41.45	41.58
	9	42.63	42.74	42.43
HCM4	10	42.32	42.16	42.39
	11	43.34	43.14	43.09
	12	43.28	43.86	42.79
a* values		Experiment 1	Experiment 2	Experiment 3
	Initial value	-15.68	-15.16	-16.47
HCM1	1	-15.02	-14.96	-15.02
	2	-14.71	-14.4	-14.87
	3	-15.16	-15.26	-15.18
HCM2	4	-14.85	-15.26	-15.79
	5	-16.22	-16.63	-17.22
	6	-16.03	-15.72	-16.1
HCM3	7	-16.36	-16.25	-16.05
	8	-15.42	-15.17	-16.18
	9	-17.01	-17.21	-16.63
HCM4	10	-16.42	-16.85	-16.14
	11	-16.78	-16.63	-16.66
	12	-17.11	-17.24	-17.1
b* values		Experiment 1	Experiment 2	Experiment 3
	Initial value	24.36	23.18	23.47
HCM1	1	22.86	22.16	22.27
	2	20.22	21.39	19.71
	3	22.56	22.33	21.53
HCM2	4	23.86	22.98	21.89
	5	26.92	27.52	25.09
	6	24.88	25.56	23.87
HCM3	7	25.12	24.78	25.1
	8	24.01	24.82	23.8
	9	26.01	25.62	25.17
HCM4	10	25.04	24.87	23.2
	11	26.85	26.97	26.19
	12	26.79	26.22	25.59

## Sheet: Chlorophyll values
Chlorophyll values		SPAD measurements
		Experiment 1	Experiment 2	Experiment 3
	Initial value	31.2	34.8	31.8
HCM1	1	36.5	40.6	38.7
	2	39.6	43.5	40.5
	3	33.5	39.6	34.3
HCM2	4	38.7	42.1	41.9
	5	36.8	37.1	35.9
	6	38.7	35.4	37.8
HCM3	7	33.8	36.2	39.5
	8	35.3	37.1	34.7
	9	31.9	33.8	37.2
HCM4	10	39.2	38.6	35.9
	11	38	40.2	35.8
	12	36.4	37.5	38
